# Supplementary material for: Azide-based heterobifunctional poly(ethylene oxide)s: NaN3-initiated “living” polymerization of ethylene oxide and chain end functionalizations
Source: Royal Society of Chemistry journal article supplement (doi:10.1039/c5py01444a), 2015-11-02
Supplement: c5py01444a1.pdf [file c5py01444a1.pdf]

## Supporting Information

# Azide-based heterobifunctional poly(ethylene oxide)s: $\text{NaN}_3$ -initiated “living” polymerization of ethylene oxide and chain end functionalizations

Sera Yang<sup>1</sup>, Yoon Kim<sup>1</sup>, Hyeong Cheol Kim<sup>1</sup>, Abu B. Suidique<sup>1</sup>, Gyu-saang Youn<sup>1</sup>, Hyeon Jun Kim<sup>1</sup>, Hyeon Jong Park<sup>1</sup>, Jae Yeol Lee<sup>1</sup>, Sehoon Kim<sup>2</sup>, Jungahn Kim<sup>1,\*</sup>

<sup>1</sup> Department of Chemistry, Kyung Hee University, Seoul 130-701, Korea

<sup>2</sup> Center for Theragnosis, Korea Institute of Science and Technology, Seoul 130-791,

Korea

## Experimental details

### Materials.

$\alpha$ -Azide- $\omega$ -thiol PEO ( $M_{n,\text{AzPEO}} = 4,700$  g/mol, 2 g) was dissolved in methanol 200 ml and heated to 40°C under an inert gas for 30 min. The gold(III) chloride trihydrate (tetrachloroauric(III) acid ( $\text{HAuCl}_4$ ) : Sigma-Aldrich Chem. Co., reagent) solution (0.5 g in methanol 20 ml) was delivered into the reactor using a syringe. The reaction system was kept at 40°C under an inert gas for 30 min, followed by introducing sodium borohydride (0.5 g) dissolved dropwise in methanol 60 ml with stirring. After a complete reaction (24 h), the gold solution was precipitated in excess ether and the precipitate was dried in a vacuum oven. In addition, the nano-sized gold particles using  $\alpha$ -thiol- $\omega$ -azide PEO ( $\text{HS-PEO-N}_3$ ) as the stabilizer were prepared by following the same procedures as those described in the case of  $\alpha$ -thiol- $\omega$ -amine PEO.

## Synthesis of $\alpha$ -azide- $\omega$ -amine PEO

New  $\alpha$ -azide PEO ( $M_{n,SEC} = 4,800$ ) was reacted with TsCl (tosyl chloride) in the presence of triethylamine in dichloromethane (DCM) at 40°C for 24 h. The resulting  $\alpha$ -azide- $\omega$ -tosyl PEO was further reacted with potassium thioacetate in DMF at 85°C for 24h. All products were precipitated in excess diethyl ether.  $\alpha$ -Azide- $\omega$ -thioacetate PEO was deacetylated using excess hydrazine, followed by addition of HCl (1.0 N) until the pH value reached to  $\sim 7$ . The precipitate was re-dissolved in methanol, followed by precipitation in excess diethyl ether and drying in vacuum oven at room temperature prior to analysis. The resulting  $\alpha$ -azide- $\omega$ -thiol PEO was reacted with triphenyl phosphine in methanol under refluxing for 24 h, followed by precipitation in diethyl ether and drying it.

## Supporting Data

### Synthesis of $\alpha$ -azide PEO and chain-end functionalizations.

The complete reaction was investigated through the examination of %conversion of monomer with time.

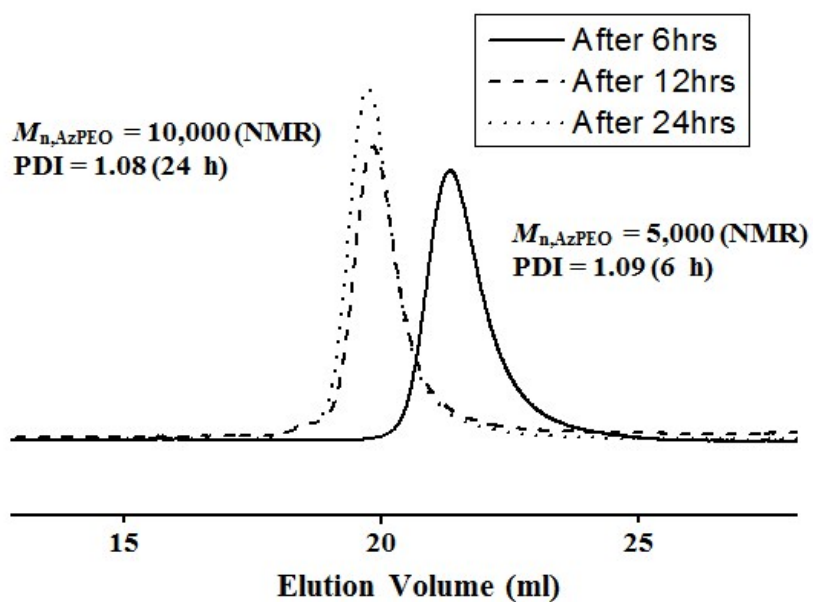

**SI Figure 1.** Size exclusion chromatograms of the formed polymers with the reaction time in  $\text{NaN}_3$ -initiated polymerization of EO in DMF at  $50^\circ\text{C}$ .

SI Figure 2 represents a typical plot of the molecular weight against %conversion in the ring-opening polymerization of EO using  $\text{NaN}_3$  as a functional anionic initiator.

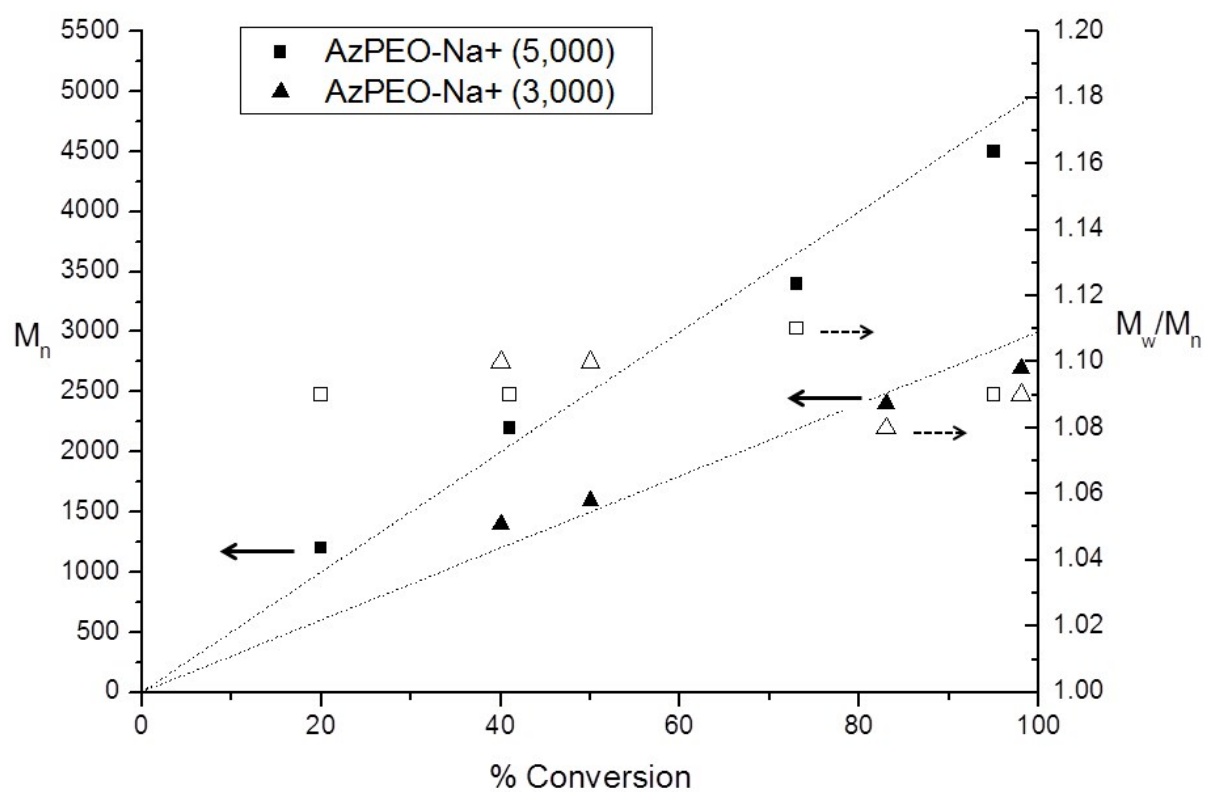

**SI Figure 2.** A typical plot of the change of molecular weight against %conversion in  $\text{NaN}_3$ -initiated polymerization of EO in DMF at  $50^\circ\text{C}$ .

The molecular weights and the molecular weight distributions of  $\alpha$ -azide PEO and the corresponding  $\alpha$ -azido- $\omega$ -bromo PEO mentioned in Figure 3 of the main text are shown in SI Figure 3.

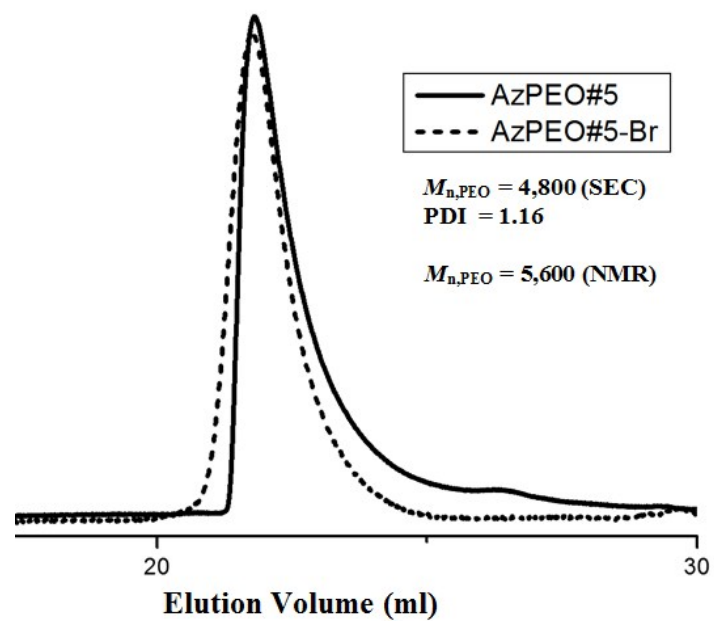

**SI Figure 3.** Size exclusion chromatograms of  $\alpha$ -azide PEO and corresponding  $\alpha$ -azido- $\omega$ -bromo PEO mentioned in Figure 2 of the main text.

In addition, the FT-IR spectra of  $\alpha$ -azide PEO (Az PEO 3) and corresponding  $\alpha$ -azide- $\omega$ -bromo PEO are shown in Figure 3 in the main text are shown in SI Figure 4.

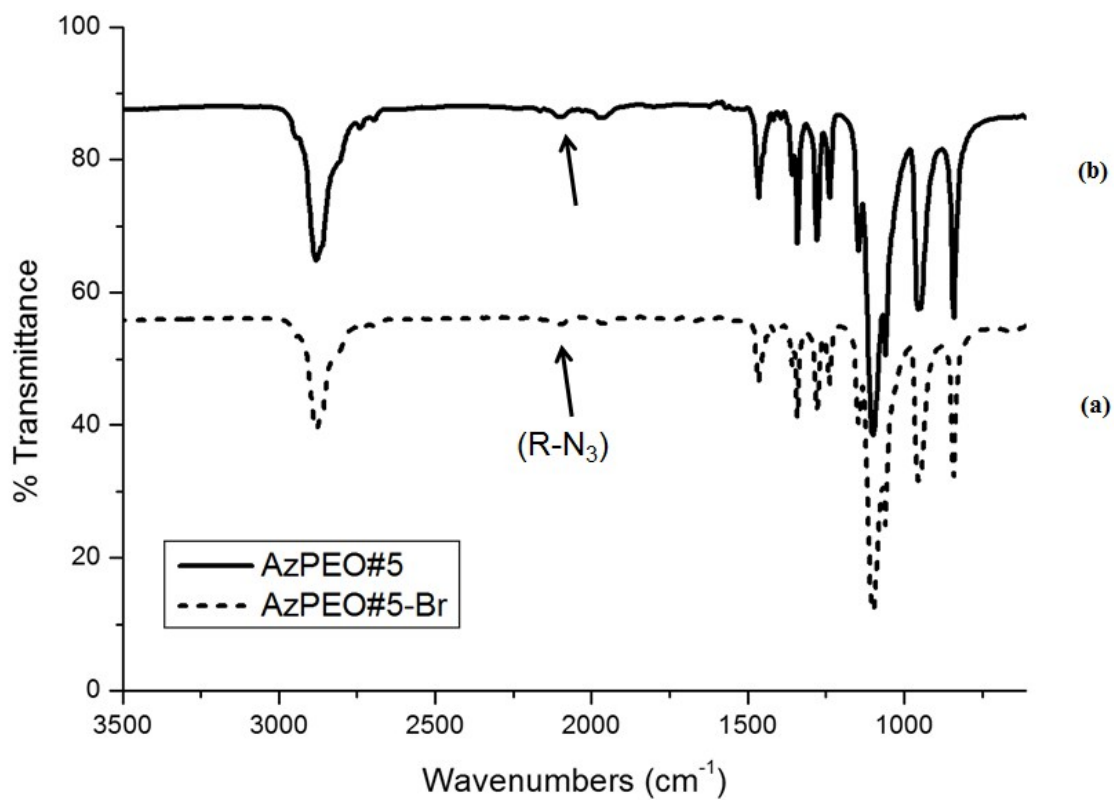

**SI Figure 4.** FT-IR spectra of  $\alpha$ -azide PEO and corresponding  $\alpha$ -azide- $\omega$ -bromo PEO.

Again,  $\alpha$ -azide- $\omega$ -bromo PEO ( $M_{n,AZPEO} = 5,600$  g/mol) was synthesized by following the same procedures as shown in Scheme 2 in the main text, followed by reaction with potassium ethyl xanthogenate in DMF because of its solubility. The SECs of all products are shown in SI Figure 5. In addition, the  $^1\text{H}$  NMR spectra of  $\alpha$ -azide- $\omega$ -bromo PEO and the corresponding RAFT agent are shown in SI Figure 6.

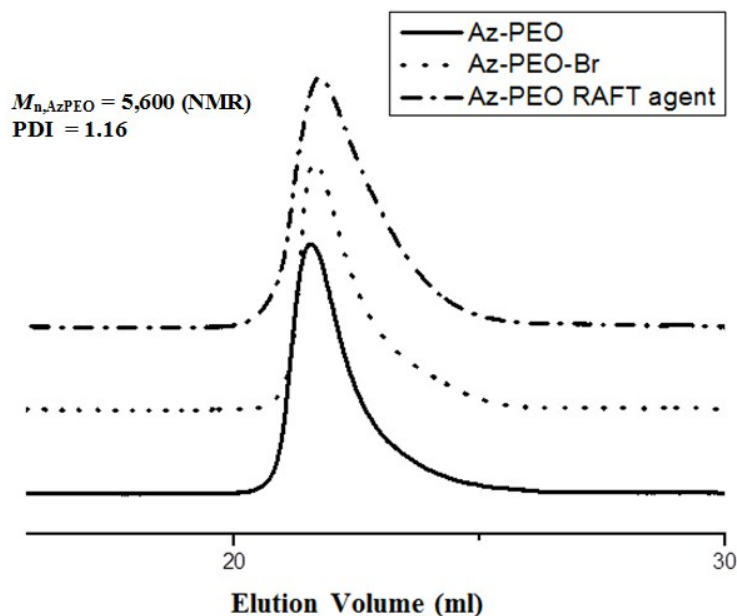

**SI Figure 5.** Size exclusion chromatograms of  $\alpha$ -azide PEO, corresponding  $\alpha$ -azide- $\omega$ -bromo PEO, and the corresponding  $\alpha$ -azide PEO-based RAFT agent.

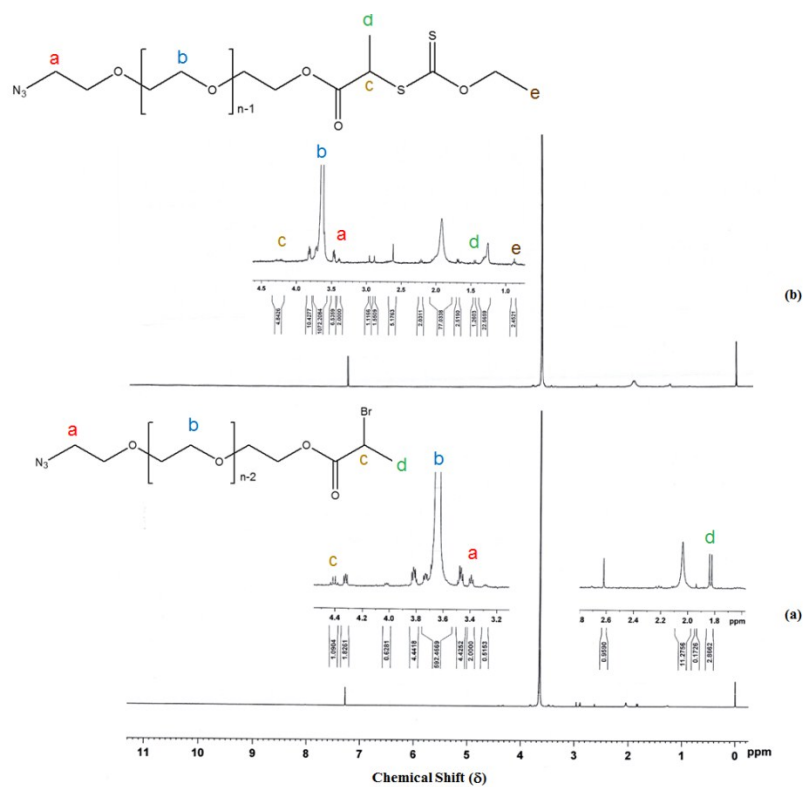

**SI Figure 6.**  $^1\text{H}$  NMR spectra of  $\alpha$ -azide- $\omega$ -bromo PEO and the corresponding  $\alpha$ -azide PEO-based RAFT agent.



In addition, SI Figure 7 shows  $^1\text{H}$  spectra of  $\alpha$ -azide- $\omega$ -tosyl PEO and corresponding  $\alpha$ -azide- $\omega$ -thiol PEO obtained from the reaction of  $\alpha$ -azide- $\omega$ -tosyl PEO with sodium hydrosulfide (NaSH) in . However, not only the thiolation yield was not quantitative but also most fractions of the azide groups were converted to the amine groups shown in SI Figure 7b.

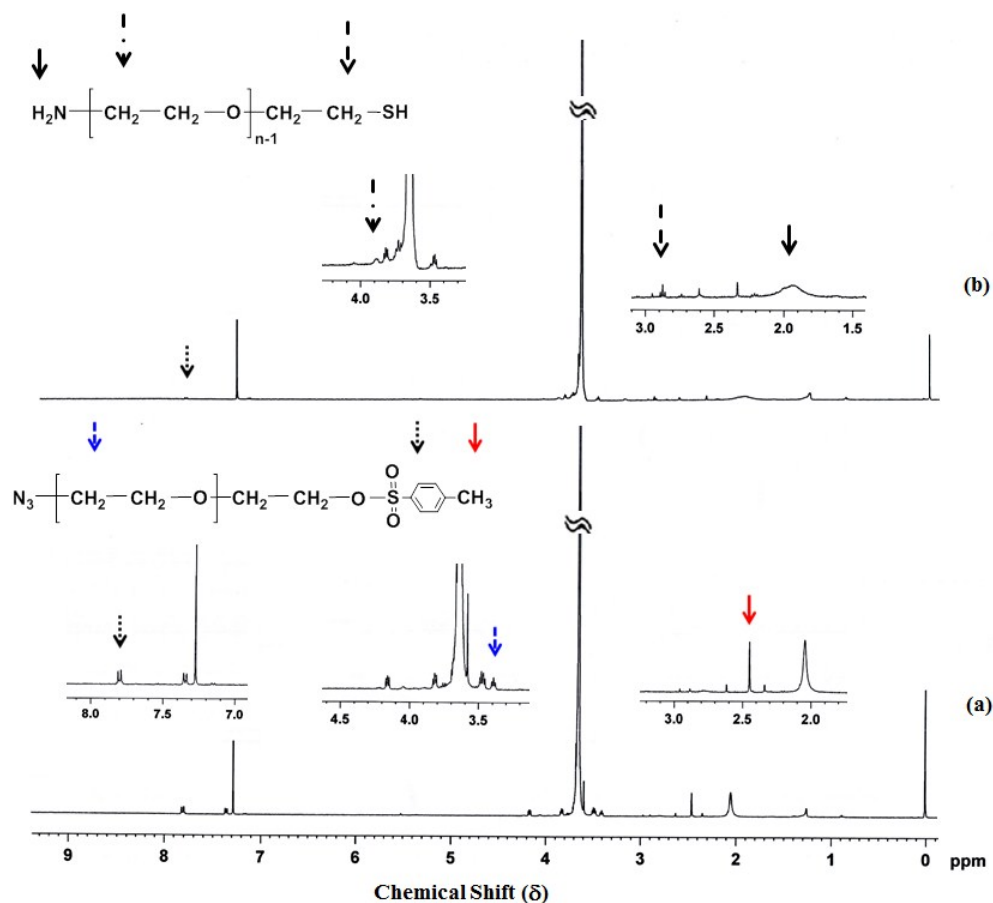

**SI Figure 7.** The  $^1\text{H}$  NMR spectra of (a)  $\alpha$ -azide- $\omega$ -tosyl PEO and (b)  $\alpha$ -amine- $\omega$ -thiol PEO obtained from the reaction using NaSH from the in  $\text{CDCl}_3$ .

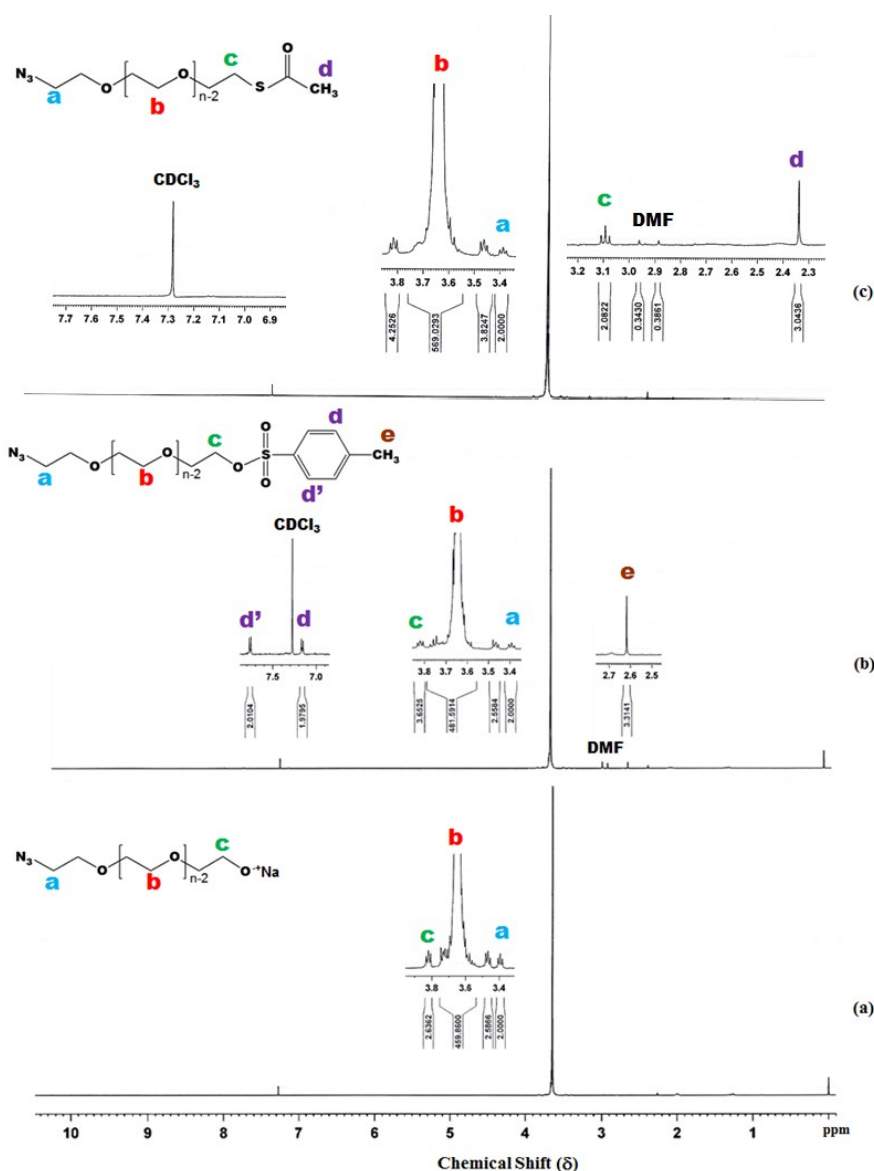

**SI Figure 8.**  $^1\text{H}$  NMR spectra of (a)  $\alpha$ -azide PEO, (b) corresponding  $\alpha$ -azide- $\omega$ -tosyl PEO, and (c) corresponding  $\alpha$ -azide- $\omega$ -thioacetate PEO in  $\text{CDCl}_3$ .

SI Figure 9 shows a comparison of size exclusion chromatograms of the deacetylated compound of  $\alpha$ -azide- $\omega$ -thioacetate PEO ( $M_{n,\text{AzPEO}} = 4,800 \text{ g/mol}$ ) using hydrazine after the treatment with  $\text{HCl}$  (1.0  $\text{N}$ ) and corresponding  $\alpha$ -amine- $\omega$ -thiol PEO obtained from the reaction of deacetylated product with triphenyl phosphine ( $\text{PPh}_3$ ). In particular,  $\alpha$ -amine- $\omega$ -thiol PEO exhibits a polyelectrolyte behavior in THF. In particular, all disulfide fractions had to be reduced to the thiol groups. SI

Figure 10 represents the  $^1\text{H}$  NMR spectra of the corresponding products. The chemical shift at  $\delta = 3.38$  ppm in SI Figure 10a disappeared after its reduction as shown in SI Figure 10b.

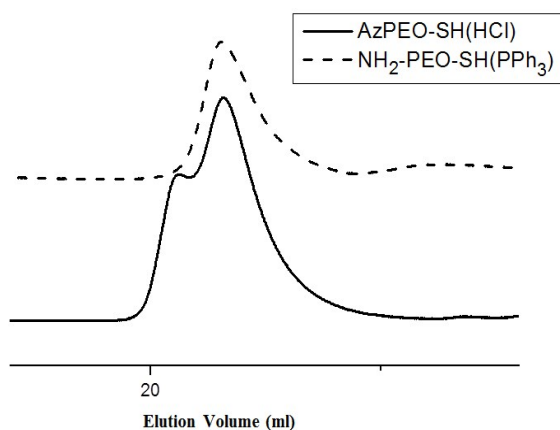

**SI Figure 9.** Size exclusion chromatograms of  $\alpha$ -azide- $\omega$ -thiol PEO and corresponding  $\alpha$ -amine- $\omega$ -thiol PEO in THF as an eluent at 30°C.

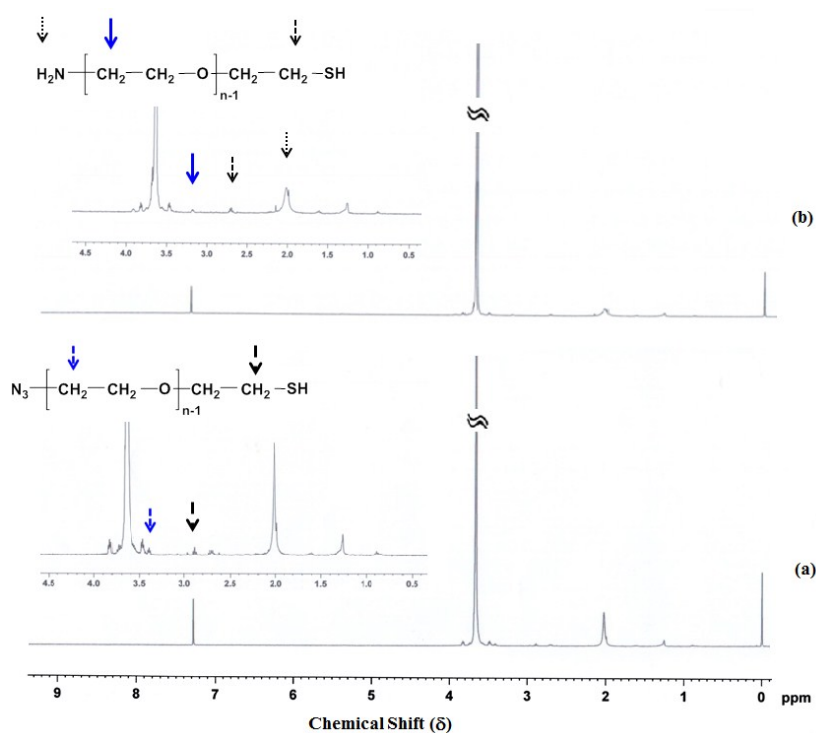

**SI Figure 10.** A comparison of the  $^1\text{H}$  NMR spectra of (a) deacetylated product,  $\alpha$ -azide- $\omega$ -thiol PEO in the main text and (b) corresponding  $\alpha$ -amine- $\omega$ -thiol PEO obtained from the reaction with triphenyl phosphine.

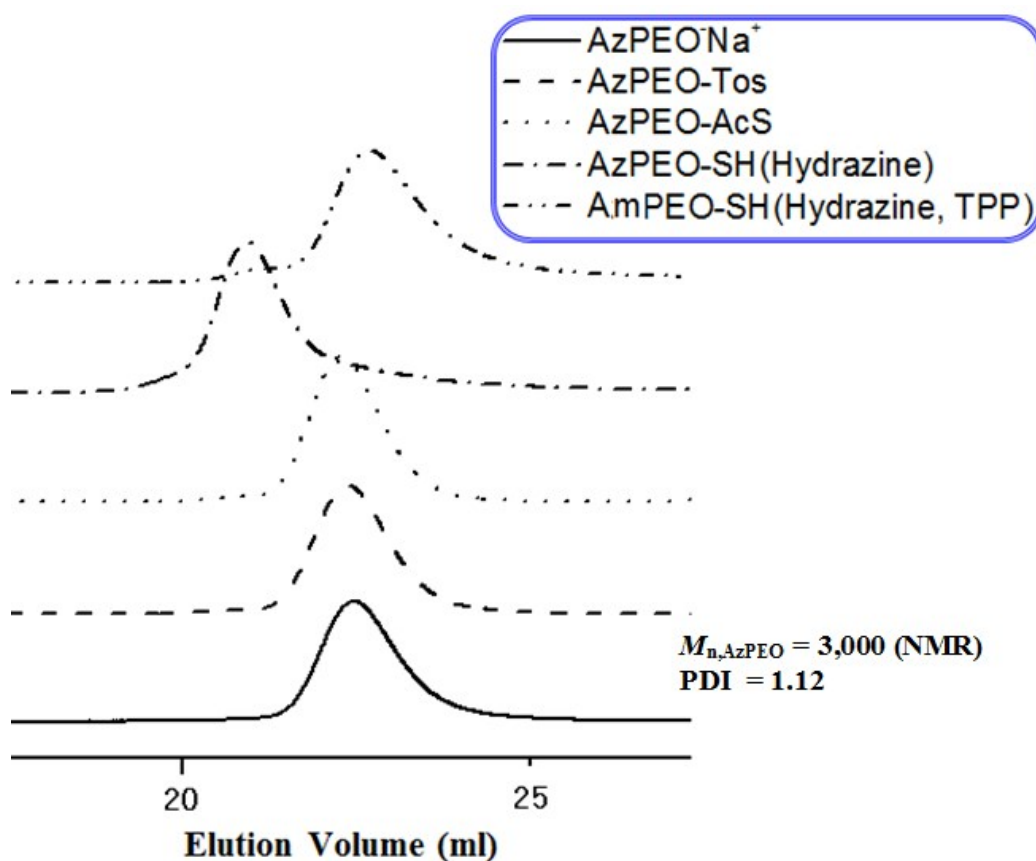

**SI Figure 11.** Size exclusion chromatograms of  $\alpha$ -azide PEO (Az PEO 4), corresponding  $\alpha$ -azide- $\omega$ -tosyl PEO, corresponding  $\alpha$ -azide- $\omega$ -thioacetate PEO, corresponding  $\alpha$ -azide- $\omega$ -thiol PEO after the treatment of hydrazine in acetonitrile, and corresponding  $\alpha$ -amine- $\omega$ -thiol PEO after reduction using triphenyl phosphine (TPP) in THF as an eluent at 30°C.

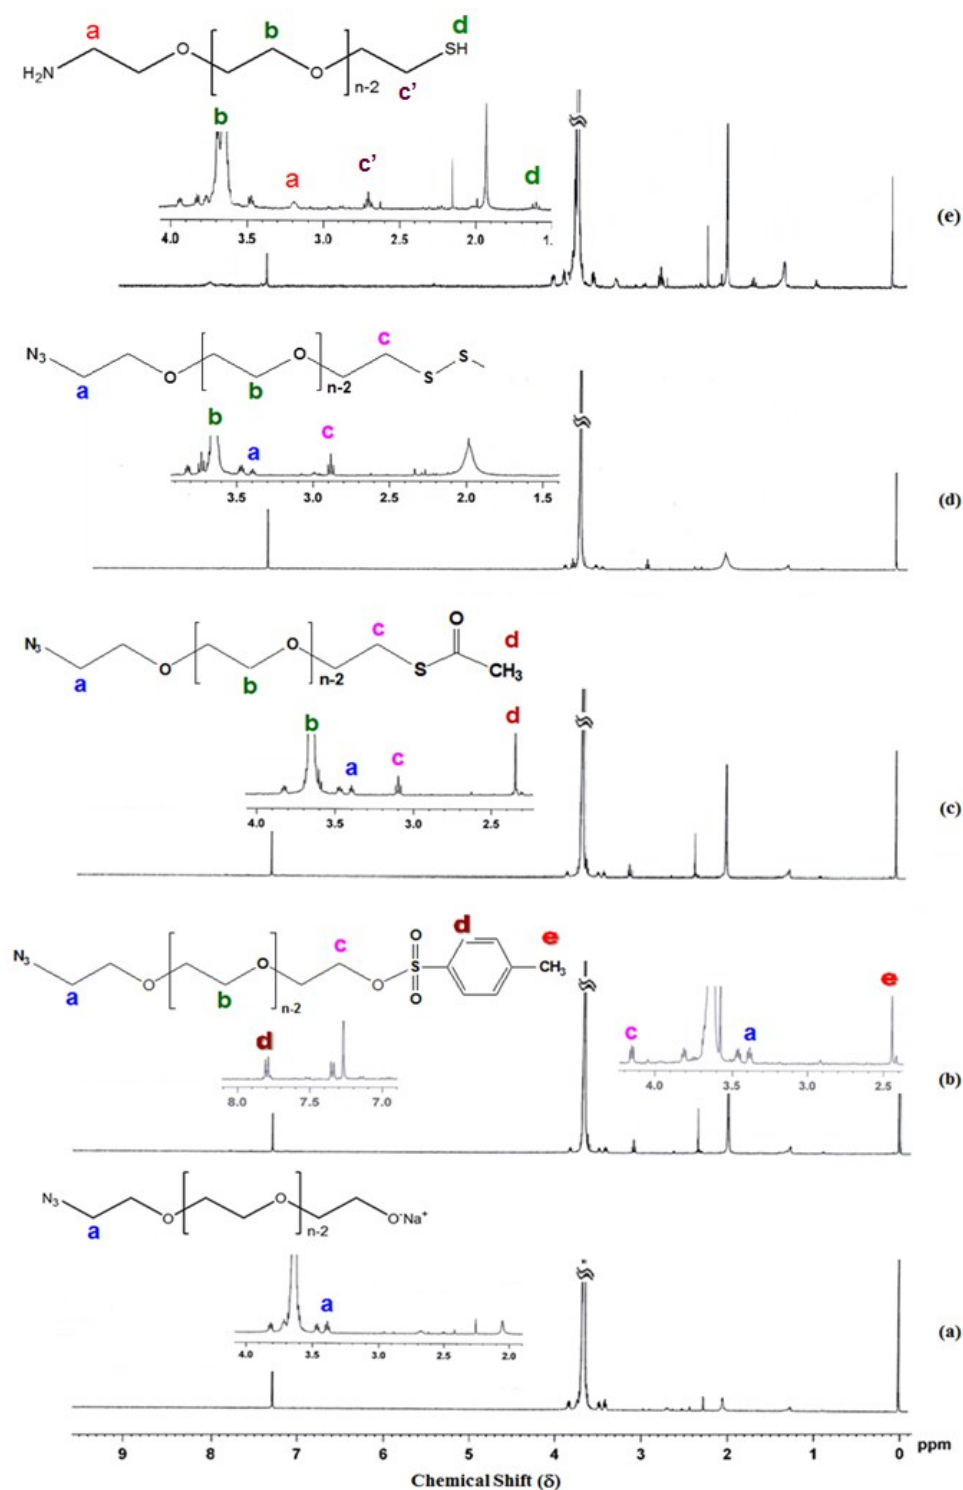

**SI Figure 12.**  $^1\text{H}$  NMR spectra of (a)  $\alpha$ -azide PEO (Az PEO 4), (b) corresponding  $\alpha$ -azide- $\omega$ -tosyl PEO, (c) corresponding  $\alpha$ -azide- $\omega$ -thioacetate PEO, (d) corresponding  $\alpha$ -azide- $\omega$ -thiol, and (e) corresponding  $\alpha$ -amine- $\omega$ -thiol PEO after reduction using triphenyl phosphine (TPP) in  $\text{CDCl}_3$ .

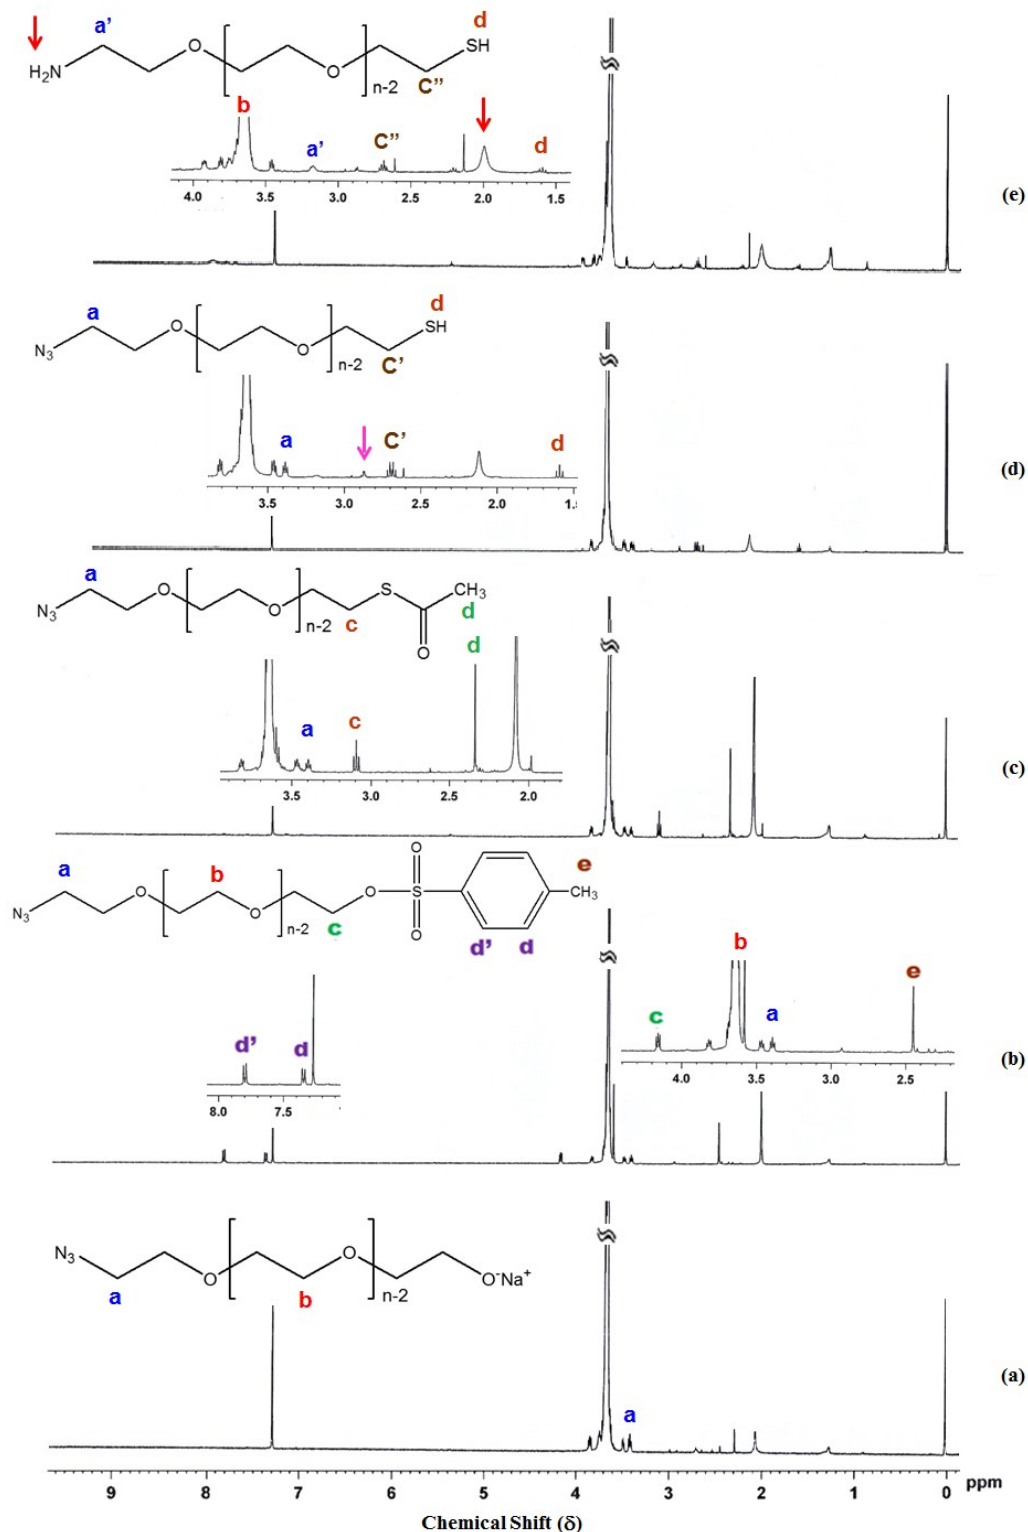

**SI Figure 13.** Comparison of the  $^1\text{H}$  NMR spectra of (a)  $\alpha$ -azide PEO, (b) corresponding  $\alpha$ -azide- $\omega$ -tosyl PEO, (c) corresponding  $\alpha$ -azide- $\omega$ -thioacetate PEO, (d) corresponding  $\alpha$ -azide- $\omega$ -thiol PEO, and (e) corresponding  $\alpha$ -amine- $\omega$ -thiol PEO in  $\text{CDCl}_3$ .

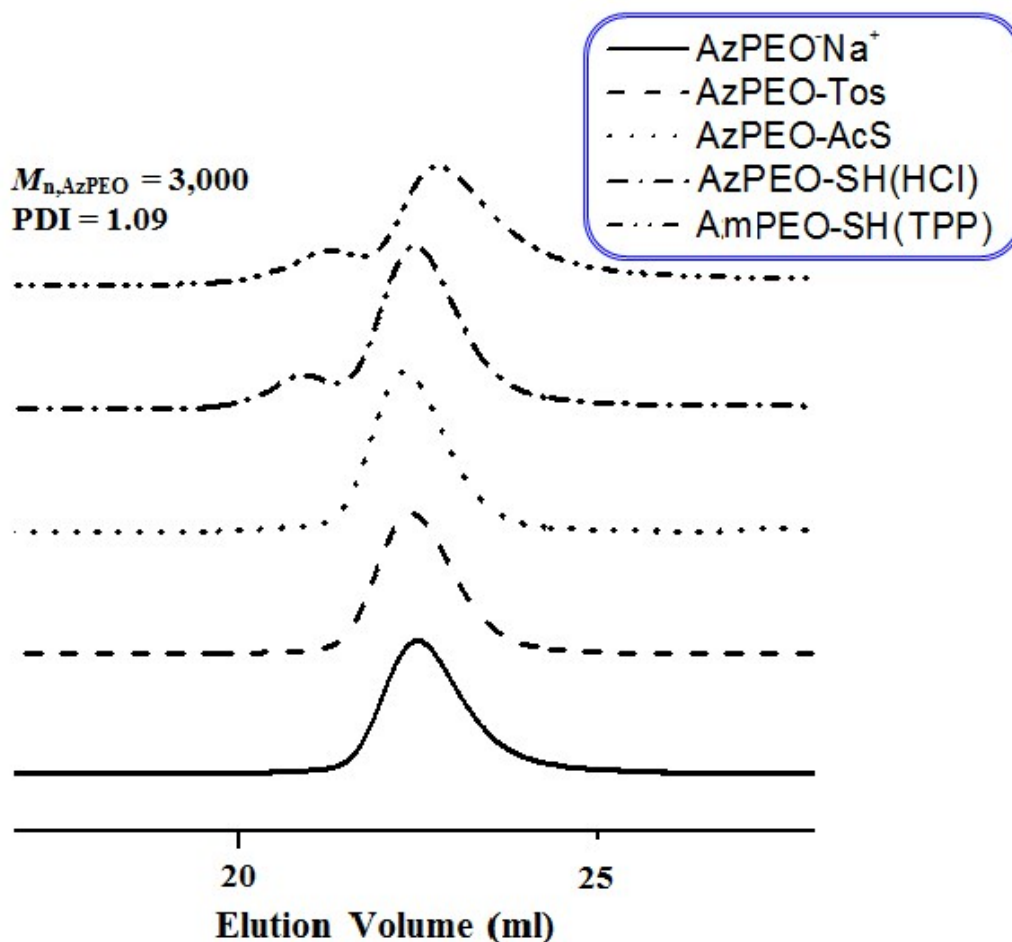

**SI Figure 14.** SECs of  $\alpha$ -azide PEO (Az PEO 4), corresponding  $\alpha$ -azide- $\omega$ -tosyl PEO, corresponding  $\alpha$ -azide- $\omega$ -thioacetate PEO, corresponding  $\alpha$ -azide- $\omega$ -thiol PEO, and corresponding  $\alpha$ -amine- $\omega$ -thiol PEO in THF at 30°C.

Originally, concerning the coupled product having the disulphide bond, a monomial product was expected to be generated through the reduction of  $\alpha$ -azide- $\omega$ -thiol PEO using triphenyl phosphine. Unfortunately, in spite of the performance of the reductive process of  $\alpha$ -azide- $\omega$ -thiol PEO using triphenyl phosphine, there was still coupled product arising from coupling of the nitrenes generated from the azide group as shown in SI Figure 14.<sup>S3</sup> This coupled product having no disulphide bond could not be reduced by triphenyl phosphine leading to a monomodal distribution.

SI Figure 15 shows the  $^1\text{H}$  NMR spectra of typical  $\alpha$ -azide PEO, corresponding  $\alpha$ -azide- $\omega$ -tosyl PEO, corresponding  $\alpha$ -azide- $\omega$ -phthalimide PEO, and corresponding  $\alpha$ -azide- $\omega$ -amine PEO in  $\text{CDCl}_3$ . The chemical shift (singlet) at  $\delta = 3.38$  ppm is assigned to the protons on the methylene group adjacent to the azide group in SI Figure 8a. The chemical shifts at  $\delta = 7.15$  ppm and  $\delta = 7.75$  ppm shown in SI Figure 8b completely disappeared in SI Figure 8c. Based on this result, the thioacetylation yield was over 98 mol%.

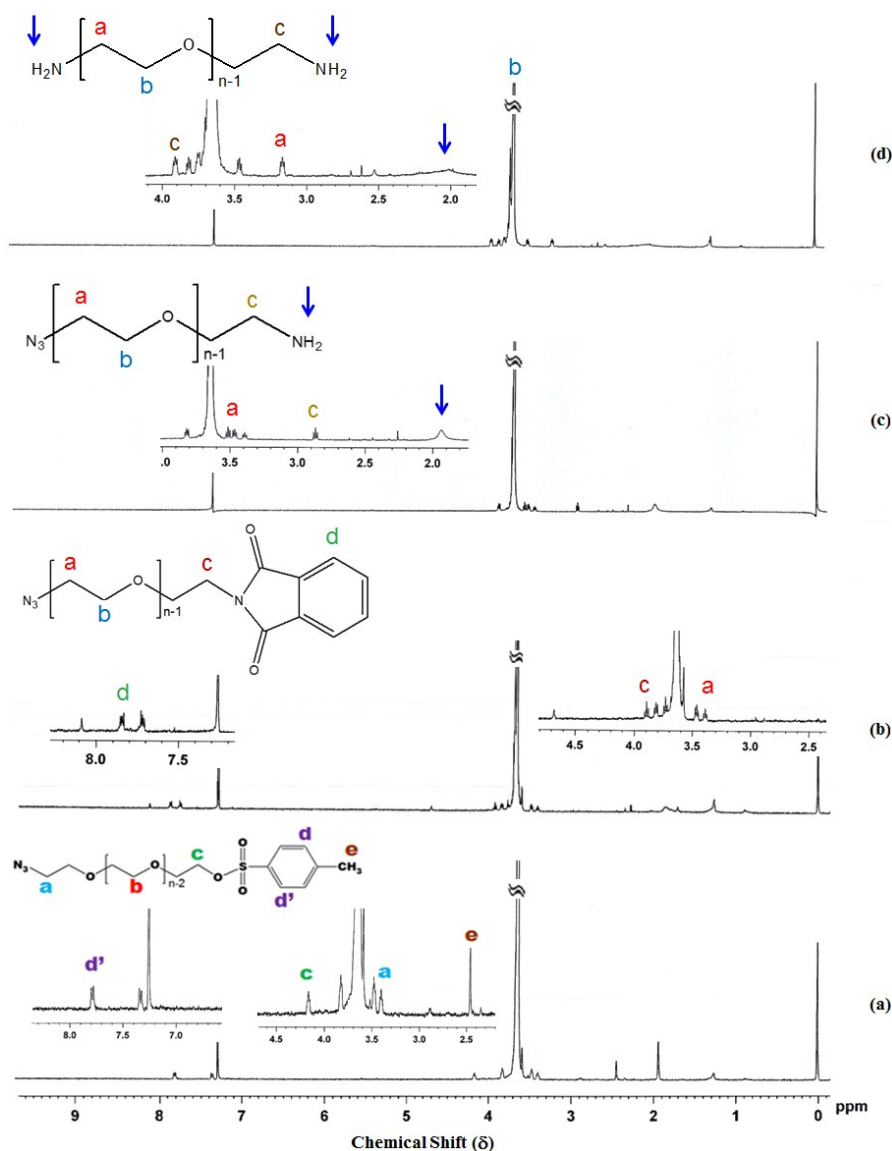

**SI Figure 15.** Comparison of  $^1\text{H}$  NMR spectra of  $\alpha$ -azide- $\omega$ -tosyl PEO, corresponding  $\alpha$ -azide- $\omega$ -phthalimide PEO, corresponding  $\alpha$ -azide- $\omega$ -amine PEO, and corresponding  $\alpha$ , $\omega$ -diamine PEO in  $\text{CDCl}_3$ .



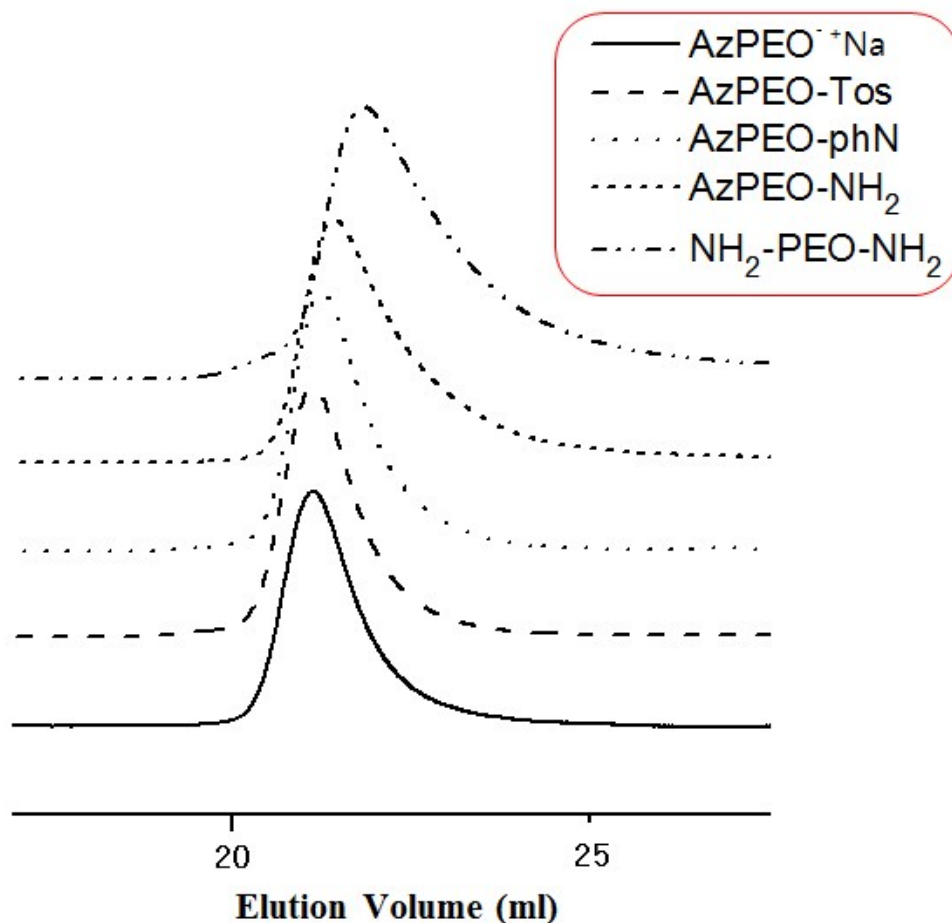

**SI Figure 16.** SECs of  $\alpha$ -azide- $\omega$ -tosyl PEO, corresponding  $\alpha$ -azide- $\omega$ -phthalimide PEO, corresponding  $\alpha$ -azide- $\omega$ -amine PEO, and corresponding  $\alpha,\omega$ -diamine PEO in THF.

In addition, tosylation of  $\alpha$ -azide PEO was carried out in DCM at 40°C for 24 h, followed by thioacetylation using potassium thioacetate. The FT-IR spectra of the resulting products exhibit no any difference shown in SI Figure 17. In particular, the asymmetric S=O stretching frequency of  $\alpha$ -azide- $\omega$ -tosyl PEO could not be distinguished in the ranges of 1372-1335  $\text{cm}^{-1}$ . However, UV visible spectrum of the chain end-tosylated product shows a great difference due to the existence of the phenyl group shown in SI Figure 18.

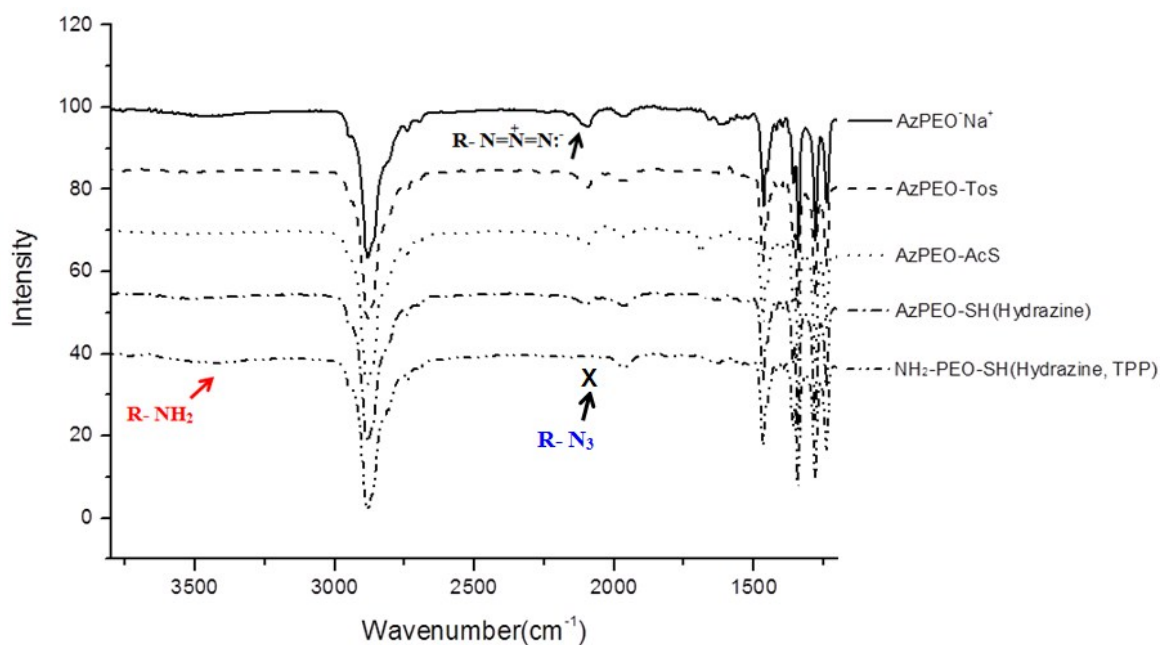

**SI Figure 17.** A comparison of the FT-IR spectra of  $\alpha$ -azide PEO (Az PEO 4), corresponding  $\alpha$ -azide- $\omega$ -tosyl PEO, corresponding  $\alpha$ -azide- $\omega$ -thioacetate PEO, corresponding  $\alpha$ -azide- $\omega$ -thio1 PEO, and corresponding  $\alpha$ -amine- $\omega$ -thio1 PEO.

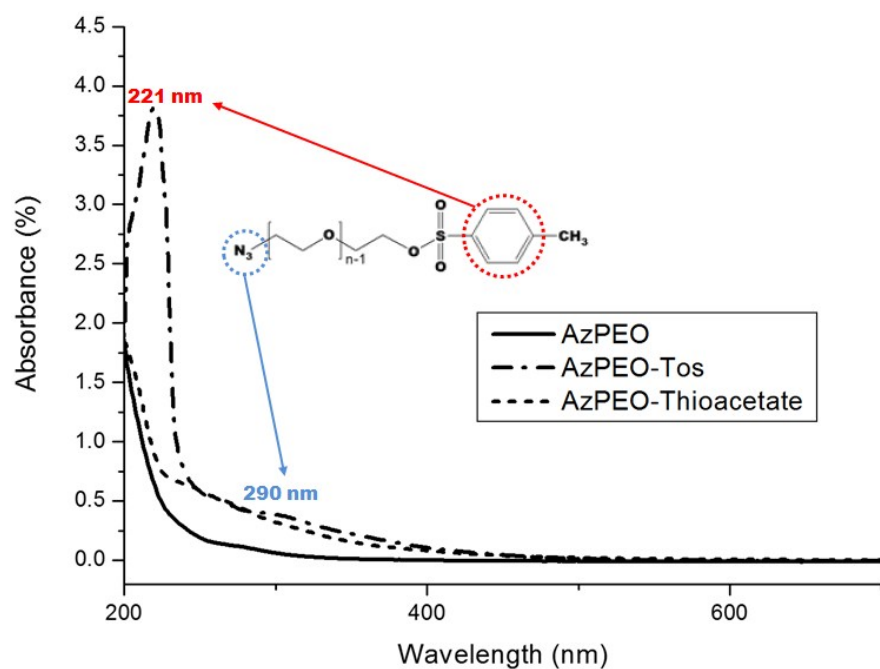

**SI Figure 18.** UV visible spectra of  $\alpha$ -azide PEO, corresponding  $\alpha$ -azide- $\omega$ -tosyl PEO, and corresponding  $\alpha$ -azido- $\omega$ -thioacetate PEO.

## Synthesis of gold nanoparticles

Both  $\alpha$ -amine- $\omega$ -thiol PEO and  $\alpha$ -azide- $\omega$ -thiol PEO were used as polymeric stabilizers for synthesizing nano-sized gold particles in methanol, their preparative procedures were described in the Experimental section in the Supporting Information. In practice, SI Figure 19 show a photo image of  $\alpha$ -amine- $\omega$ -thiol PEO-coated gold nanoparticle and UV/Visible spectra of the gold solution. The absorption maximum at  $\delta = 535$  nm indicates a simple generation of typical gold nanoparticles.

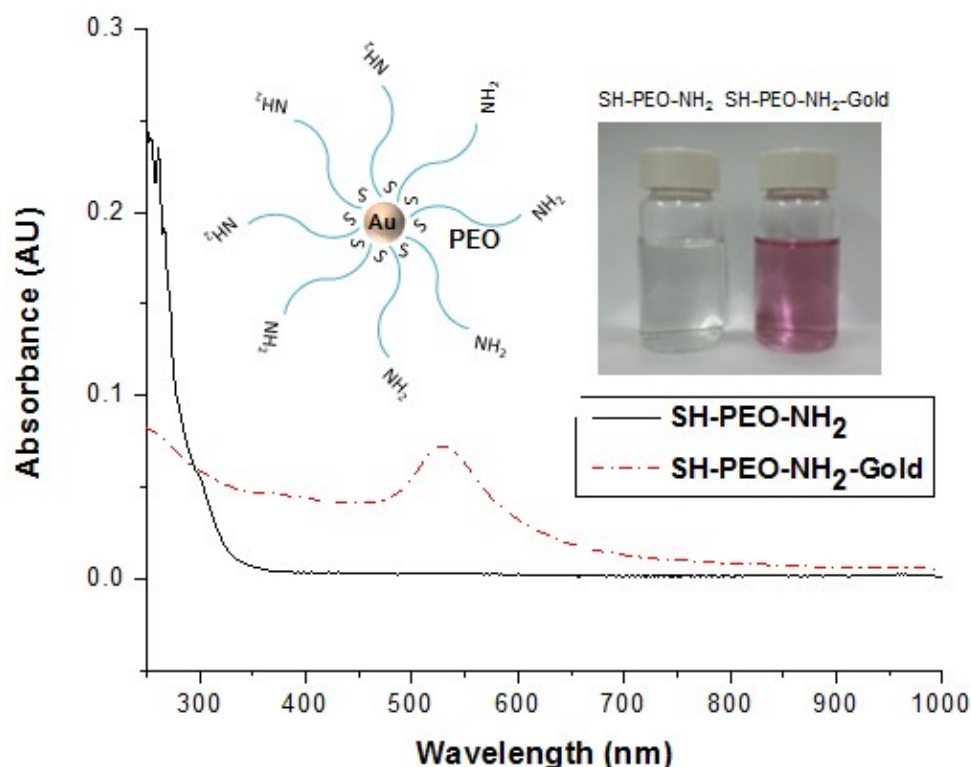

**SI Figure 19.** UV/Visible spectra of  $\alpha$ -amine- $\omega$ -thiol PEO (Az PEO 3) in methanol and  $\alpha$ -amine- $\omega$ -thiol PEO-coated gold nanoparticle solution and their photo images.

In addition, SI Figure 20 shows UV/Visible spectra of  $\alpha$ -azide- $\omega$ -thiol PEO,  $\alpha$ -azide- $\omega$ -thiol PEO-coated gold nanoparticle in methanol and their photo images. Presumably, the appearance of the absorption maximum of  $\alpha$ -azide- $\omega$ -thiol PEO at  $\delta = 310$  nm informs the existence of the azide group and the absorption maximum of  $\alpha$ -azide- $\omega$ -thiol PEO-coated gold nanoparticle appears at  $\delta = 535$

nm like  $\alpha$ -amine- $\omega$ -thiol PEO-coated gold nanoparticle. The important aspect in this study is to show clearly different UV/Visible spectra of  $\alpha$ -amine- $\omega$ -thiol PEO and  $\alpha$ -azide- $\omega$ -thiol PEO.

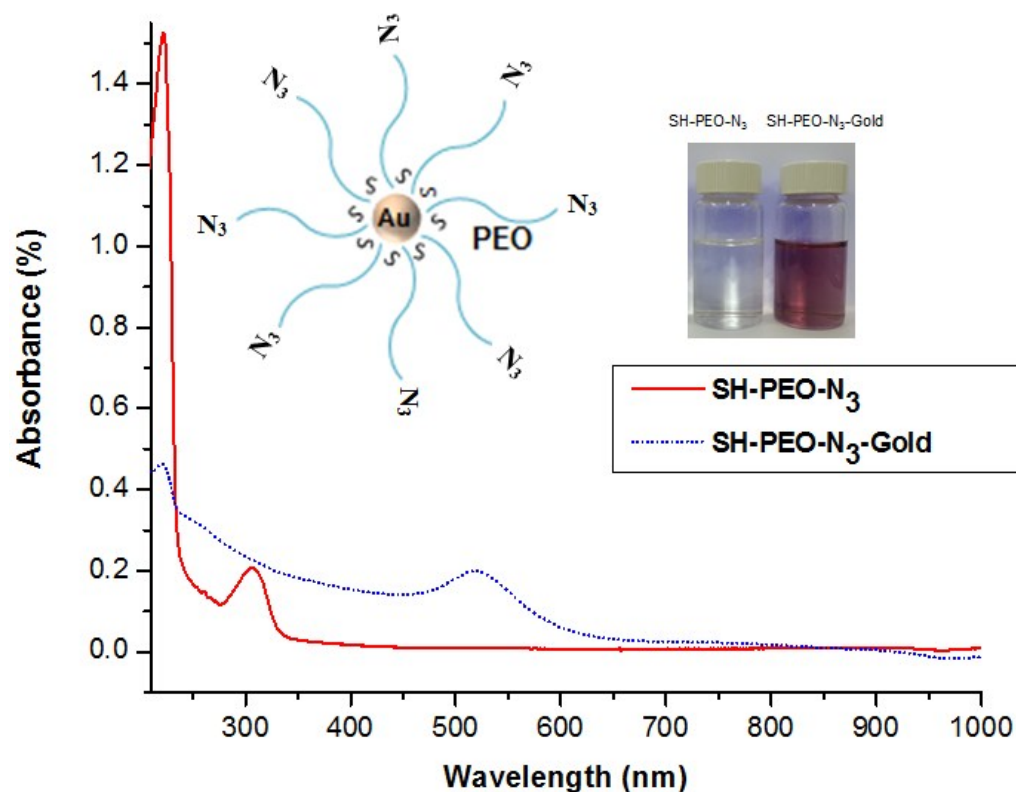

**SI Figure 20.** UV/Visible spectra of  $\alpha$ -azide- $\omega$ -thiol PEO (Az PEO 4) in methanol and  $\alpha$ -azide- $\omega$ -thiol PEO-coated gold nanoparticle solution and their photo images.

## REFERENCES

- (S1) J. H. Maeng, D.-H. Lee, K. H. Jung, Y. H. Bae, I.-S. Park, S. Jeong, Y.-S. Jeon, C.-K. Shim, W. Kim, J. Kim, J. Lee, Y.-M. Lee, J.-H. Kim, W.-H. Kim and S.-S. Hong, *Biomaterials*, 2010, **31**, 4995-5006.
- (S2) J. Kim, S. Lee, J. H. Nam, Y. J. Cho, J. Kim, J. Y. Lee, H.-J. Kang, S. Kim, H. T. Kim, H. M. Park and J. Kim, *Macromol. Res.*, 2011, **19**(7), 716-721.
- (S3) P. N. D. Singh, S. M. Mandel, R. M. Robinson, Z. Zhu, R. Franz, B. S. Ault and A. D. Gudmundsdottir, *J. Org. Chem.*, 2003, **68**, 7951-7960.
